# Supplementary material for: The disappearance of IPO in myocardium of diabetes mellitus rats is associated with the increase of succinate dehydrogenase-flavin protein
Source: Springer Nature journal article supplement (doi:10.1186/s12872-021-01949-z), 2021-03-17

**The disappearance of IPO in myocardium of diabetes mellitus rats is associated with the increase of succinate dehydrogenase-flavin protein**

MENGYUAN DENG<sup>1\*</sup>, WEI CHEN<sup>1\*</sup>, HAIYING WANG<sup>1</sup>, YAN WANG<sup>1</sup>,  
WENJING ZHOU<sup>2</sup> and TIAN YU<sup>3</sup>

<sup>1</sup>Department of Anesthesiology, Affiliated Hospital of Zunyi Medical University, Zunyi, Guizhou, 563003; <sup>2</sup>Anesthesia laboratory, Affiliated Hospital of Zunyi Medical University, Zunyi; <sup>3</sup>Zunyi Medical University, Zunyi, P.R. China

\*Contributed equally

*Correspondence to:* Professor Haiying Wang, Department of Anesthesiology, Affiliated Hospital of Zunyi Medical University, 563003; 149 Dalian Road, Huichuan District, Zunyi, Guizhou 563003, P.R China.

E-mail: [wanghaiting-8901@163.com](mailto:wanghaiting-8901@163.com)

**Figure 1**

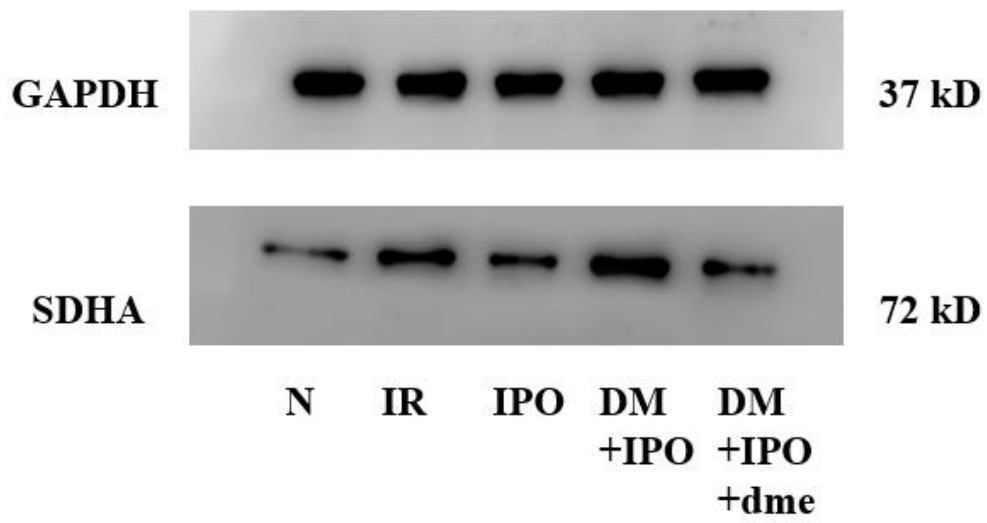

The original image without crop and correction as follows.

**GAPDH:**

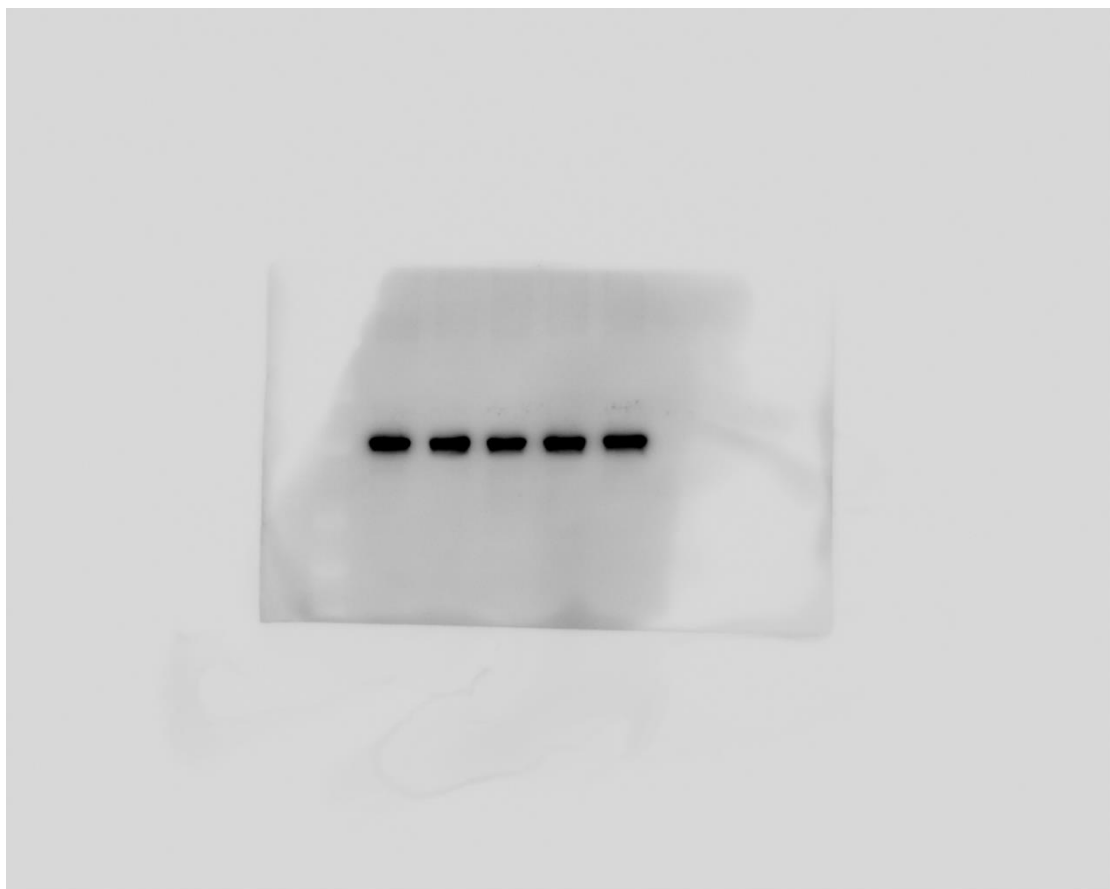

**SDHA**

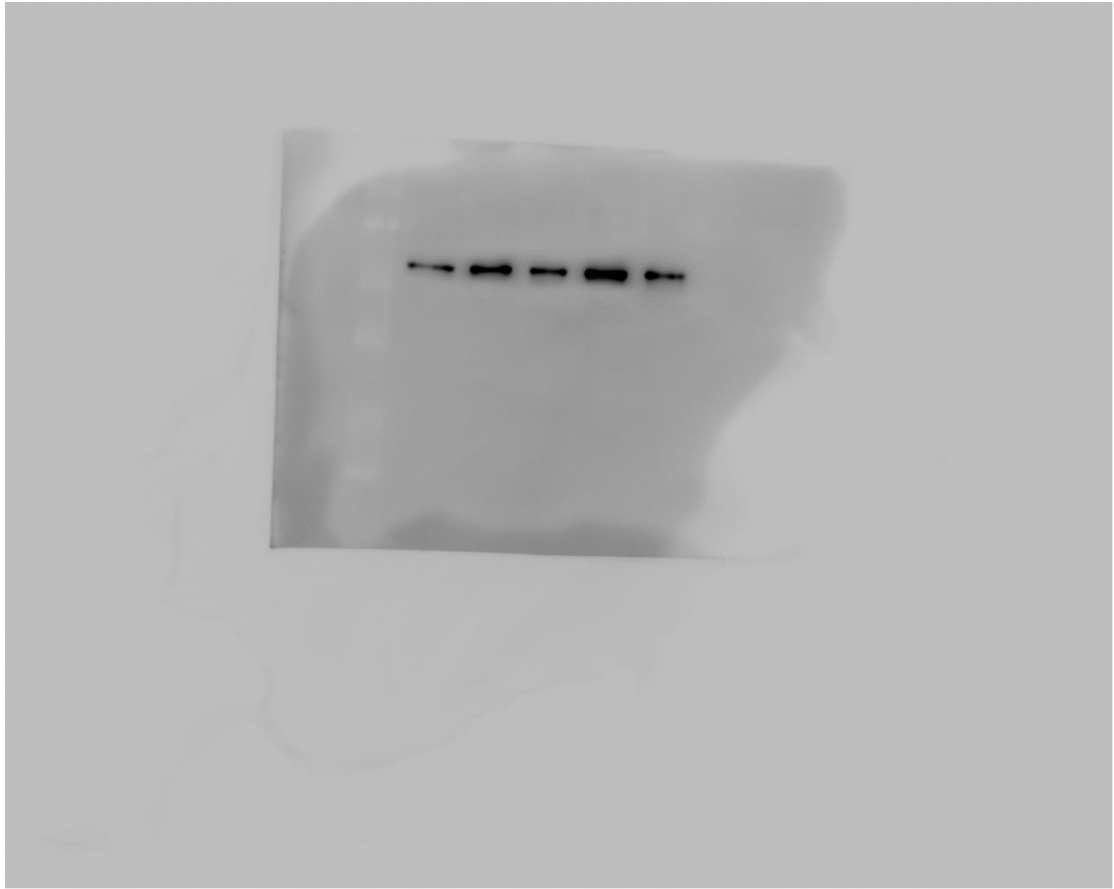

Supplement: MOESM1 [file 18976276]
